# Supplementary material
Source: PubMed Central journal article supplement (PMC5003174)
Supplement: NIHMS797564-supplement-supp_fig1.pdf [file NIHMS797564-supplement-supp_fig1.pdf]

# Supplementary Figure 1

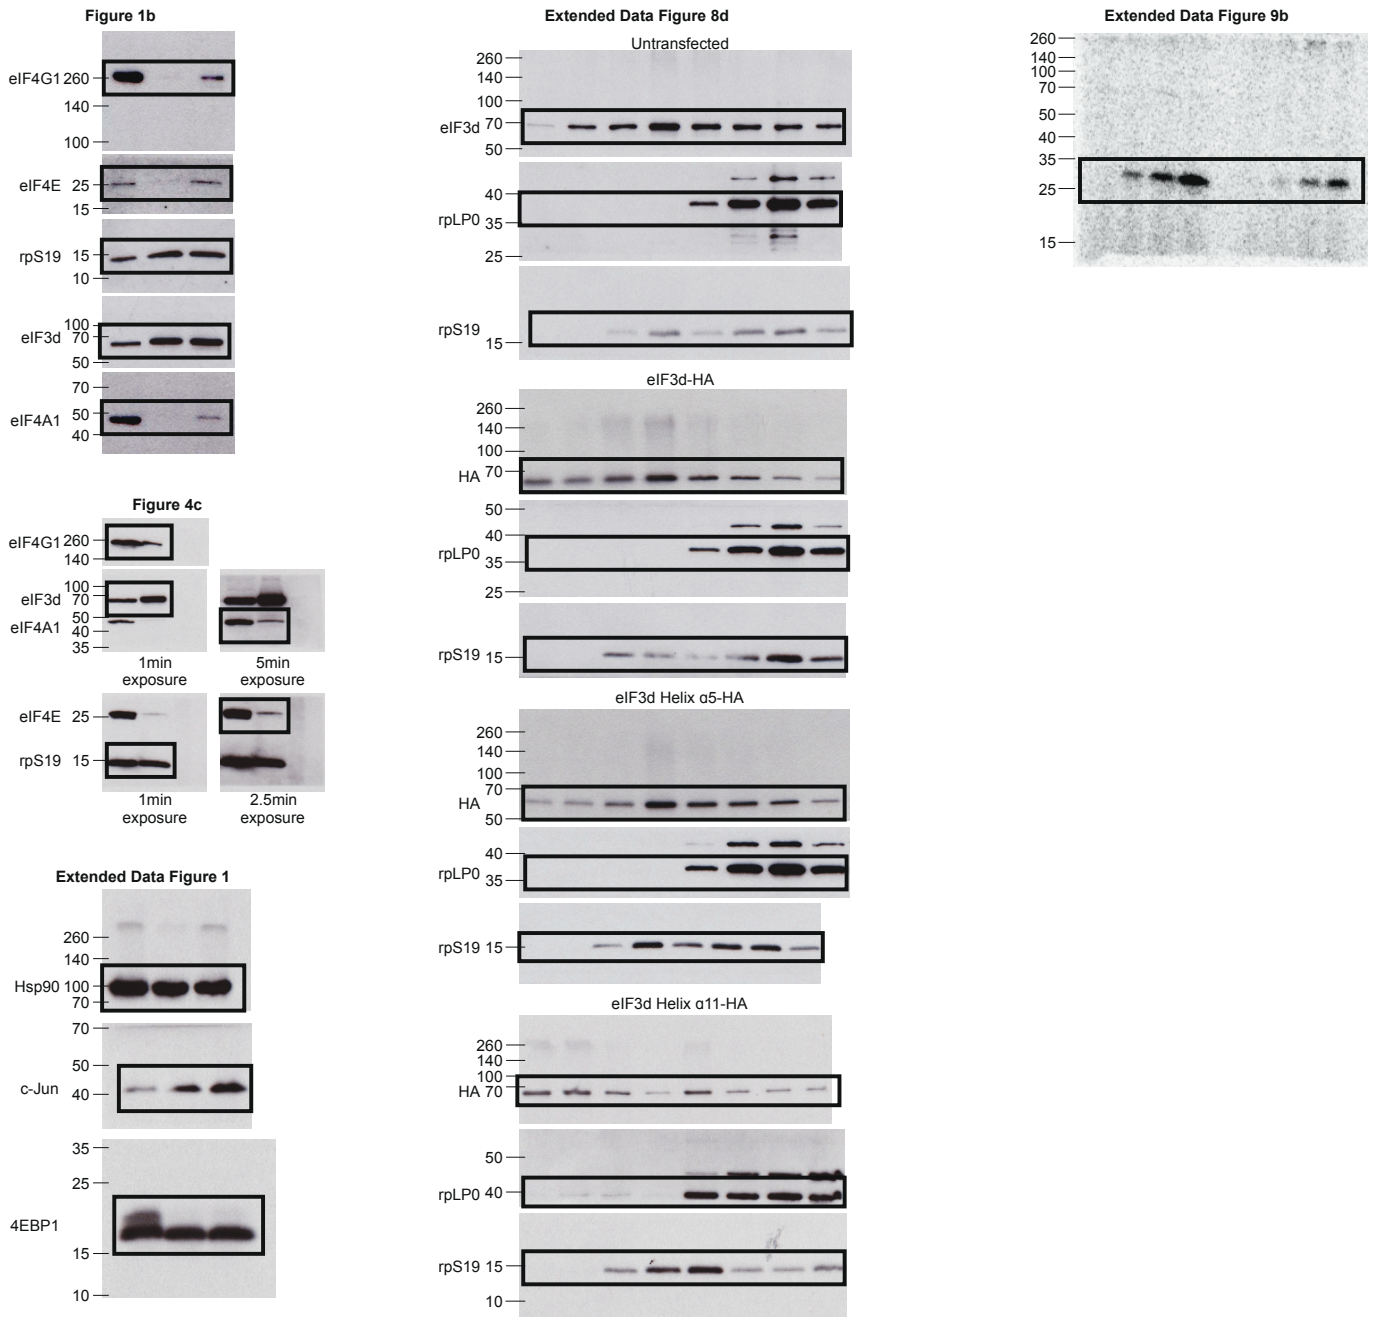

Supplementary Figure 1 | Uncropped blots from Figures 1b, 4c, and Extended Data Figures 1, 8d, 9b.
